# Supplementary material for: Shopping for Ecological Indices? On the Use of Incidence-Based Species Compositional Similarity Measures
Source: MDPI journal article supplement (doi:10.3390/d14050384), 2022-05-12
Supplement: s1 [file s1]

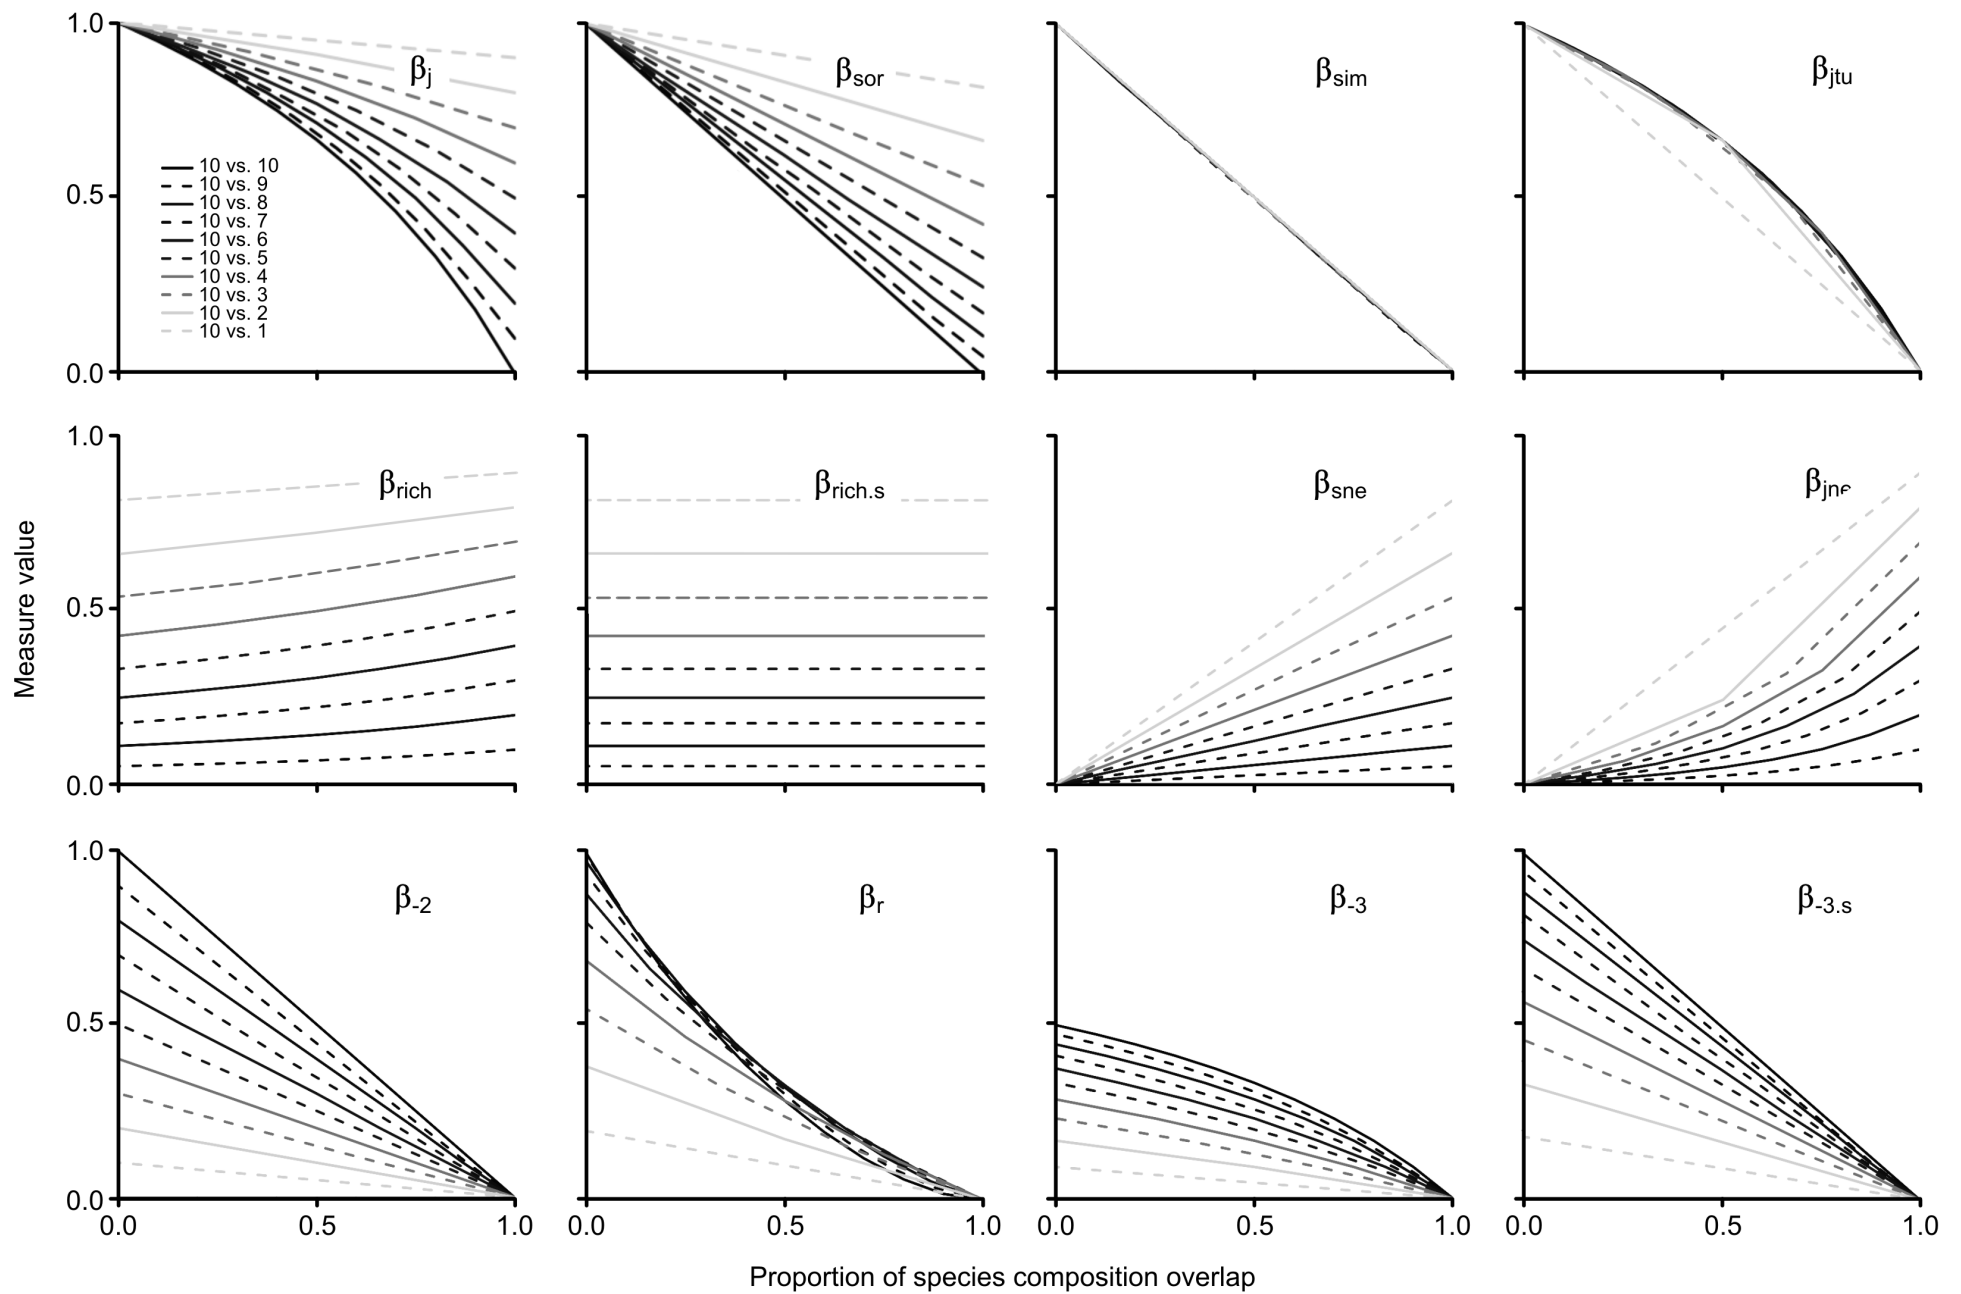

Figure S2: Gradual species composition overlap between paired assemblages considering progressive differences in species richness displaying re-expressed formulas for homogeneity (see Figure 4 for non-re-expressed results)
