# Supplementary material for: Shopping for Ecological Indices? On the Use of Incidence-Based Species Compositional Similarity Measures
Source: MDPI journal article supplement (doi:10.3390/d14050384), 2022-05-12
Supplement: s1 [file s1]

**Table S2.** Results of Spearman correlations between the size of randomly generated paired assemblages under scenarios of varying differences of species richness (1:1, 1:0.5, 1:0.1), considering highly-conservative Holm-Bonferroni sequential adjustments of P-values. Significant results are marked with an asterisk.

|                         | <b>1:1</b> |          | <b>1:0.5</b> |          | <b>1:0.1</b> |          |
|-------------------------|------------|----------|--------------|----------|--------------|----------|
| <b>Measure</b>          | <b>r</b>   | <b>P</b> | <b>r</b>     | <b>P</b> | <b>r</b>     | <b>P</b> |
| $\beta_j$               | -0.074     | 0.465    | 0.117        | 0.246    | 0.273        | 0.006    |
| $\beta_{\text{sor}}$    | -0.042     | 0.679    | 0.132        | 0.19     | 0.276        | 0.005    |
| $\beta_{\text{sim}}$    | 0.042      | 0.679    | -0.077       | 0.446    | 0.08         | 0.427    |
| $\beta_{-3}$            | 0.074      | 0.465    | -0.018       | 0.859    | 0.106        | 0.292    |
| $\beta_{-2}$            | 0.042      | 0.679    | -0.034       | 0.738    | 0.102        | 0.314    |
| $\beta_r$               | 0.004      | 0.967    | -0.081       | 0.421    | 0.095        | 0.346    |
| $\beta_{\text{sne}}$    | –          | –        | -0.034       | 0.737    | -0.154       | 0.127    |
| $\beta_{\text{itu}}$    | 0.074      | 0.465    | -0.048       | 0.632    | 0.124        | 0.218    |
| $\beta_{\text{jne}}$    | –          | –        | -0.017       | 0.871    | -0.15        | 0.136    |
| $\beta_{\text{rich}}$   | –          | –        | -0.227       | 0.023    | -0.374       | <0.0001* |
| $\beta_{\text{rich.s}}$ | –          | –        | -0.439       | <0.0001* | -0.489       | <0.0001* |
| $\beta_{-3.s}$          | 0.042      | 0.679    | -0.048       | 0.636    | 0.1          | 0.323    |
