# Supplementary material for: Shopping for Ecological Indices? On the Use of Incidence-Based Species Compositional Similarity Measures
Source: MDPI journal article supplement (doi:10.3390/d14050384), 2022-05-12
Supplement: s1 [file s1]

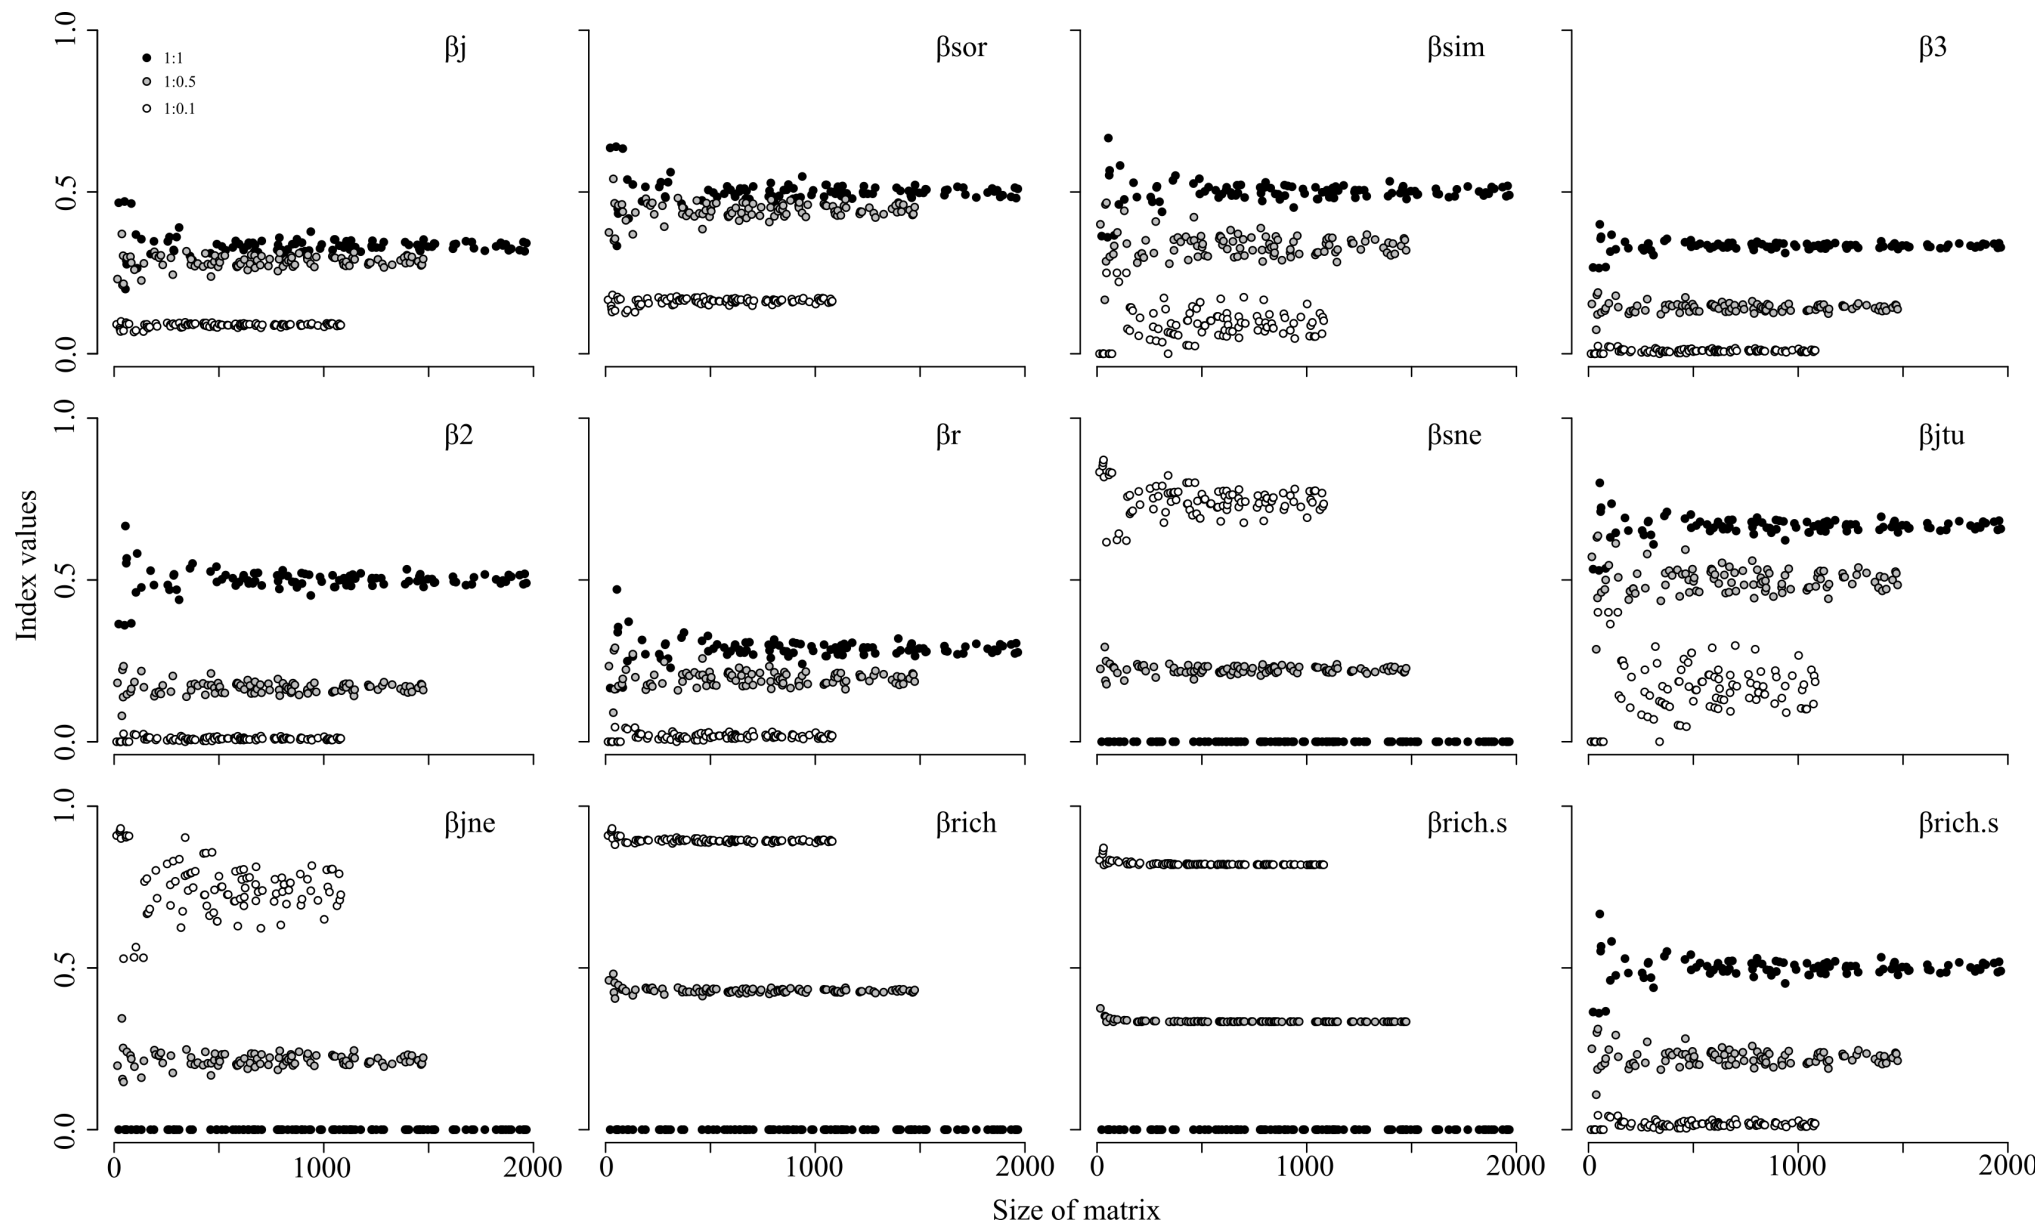

Figure S1: Correlation between the matrix size of randomly generated paired assemblages differing in species richness (black: 1:1; gray: 1:0.5; white: 1:0.1) and the 12 assessed  $\beta$ -diversity measures
