# Supplementary material for: Shopping for Ecological Indices? On the Use of Incidence-Based Species Compositional Similarity Measures
Source: MDPI journal article supplement (doi:10.3390/d14050384), 2022-05-12
Supplement: s1 [file s1]

**Table S1.** Results of the calculation of the 12 assessed measures using both sets of hypothetical scenarios, namely those from Baselga (2010) and the ones suggested in this study (New scenarios), to test the role of species richness differences controlling for the number of shared species.

|                       | $\beta_j$ | $\beta_{sor}$ | $\beta_{sim}$ | $\beta_{jtu}$ | $\beta_{rich}$ | $\beta_{rich.s}$ | $\beta_{sne}$ | $\beta_{jne}$ | $\beta_{-2}$ | $\beta_r$ | $\beta_{-3}$ | $\beta_{-3.s}$ |
|-----------------------|-----------|---------------|---------------|---------------|----------------|------------------|---------------|---------------|--------------|-----------|--------------|----------------|
| <b>Baselga (2010)</b> |           |               |               |               |                |                  |               |               |              |           |              |                |
| A1-A2                 | 0.33      | 0.50          | 0.00          | 0.00          | 0.67           | 0.50             | 0.50          | 0.67          | 0.00         | 0.00      | 0.00         | 0.00           |
| A1-A3                 | 0.17      | 0.29          | 0.00          | 0.00          | 0.83           | 0.71             | 0.71          | 0.83          | 0.00         | 0.00      | 0.00         | 0.00           |
| A2-A3                 | 0.50      | 0.67          | 0.00          | 0.00          | 0.50           | 0.33             | 0.33          | 0.50          | 0.00         | 0.00      | 0.00         | 0.00           |
| B1-B2                 | 0.33      | 0.50          | 0.50          | 0.67          | 0.00           | 0.00             | 0.00          | 0.00          | 0.50         | 0.29      | 0.33         | 0.50           |
| B1-B3                 | 0.33      | 0.50          | 0.50          | 0.67          | 0.00           | 0.00             | 0.00          | 0.00          | 0.50         | 0.29      | 0.33         | 0.50           |
| B2-B3                 | 0.33      | 0.50          | 0.50          | 0.67          | 0.00           | 0.00             | 0.00          | 0.00          | 0.50         | 0.29      | 0.33         | 0.50           |
| C1-C2                 | 0.50      | 0.67          | 0.00          | 0.00          | 0.50           | 0.33             | 0.33          | 0.50          | 0.00         | 0.00      | 0.00         | 0.00           |
| C1-C3                 | 0.50      | 0.67          | 0.00          | 0.00          | 0.50           | 0.33             | 0.33          | 0.50          | 0.00         | 0.00      | 0.00         | 0.00           |
| C2-C3                 | 0.33      | 0.50          | 0.50          | 0.67          | 0.00           | 0.00             | 0.00          | 0.00          | 0.50         | 0.29      | 0.33         | 0.50           |
| D1-D2                 | 0.00      | 0.00          | 1.00          | 1.00          | 0.50           | 0.50             | 0.00          | 0.00          | 0.33         | 0.60      | 0.25         | 0.50           |
| D1-D3                 | 0.00      | 0.00          | 1.00          | 1.00          | 0.71           | 0.71             | 0.00          | 0.00          | 0.17         | 0.32      | 0.14         | 0.29           |
| D2-D3                 | 0.00      | 0.00          | 1.00          | 1.00          | 0.33           | 0.33             | 0.00          | 0.00          | 0.50         | 0.80      | 0.33         | 0.67           |
| <b>New scenarios</b>  |           |               |               |               |                |                  |               |               |              |           |              |                |
| X1-X2                 | 1.00      | 1.00          | 0.00          | 0.00          | 0.00           | 0.00             | 0.00          | 0.00          | 0.00         | 0.00      | 0.00         | 0.00           |
| X1-X3                 | 0.33      | 0.50          | 0.50          | 0.67          | 0.00           | 0.00             | 0.00          | 0.00          | 0.50         | 0.29      | 0.33         | 0.50           |
| X1-X4                 | 0.00      | 0.00          | 1.00          | 1.00          | 0.00           | 0.00             | 0.00          | 0.00          | 1.00         | 1.00      | 0.50         | 1.00           |
| Y1-Y2                 | 0.50      | 0.67          | 0.00          | 0.00          | 0.50           | 0.33             | 0.33          | 0.50          | 0.00         | 0.00      | 0.00         | 0.00           |
| Y1-Y3                 | 0.20      | 0.33          | 0.50          | 0.67          | 0.40           | 0.33             | 0.17          | 0.13          | 0.25         | 0.32      | 0.20         | 0.33           |
| Y1-Y4                 | 0.00      | 0.00          | 1.00          | 1.00          | 0.33           | 0.33             | 0.00          | 0.00          | 0.50         | 0.80      | 0.33         | 0.67           |
| Z1-Z2                 | 0.16      | 0.28          | 0.00          | 0.00          | 0.84           | 0.72             | 0.72          | 0.84          | 0.00         | 0.00      | 0.00         | 0.00           |
| Z1-Z3                 | 0.07      | 0.14          | 0.50          | 0.67          | 0.78           | 0.72             | 0.36          | 0.26          | 0.08         | 0.14      | 0.07         | 0.14           |
| Z1-Z4                 | 0.00      | 0.00          | 1.00          | 1.00          | 0.72           | 0.72             | 0.00          | 0.00          | 0.16         | 0.31      | 0.14         | 0.28           |
